# In Situ Proteolysis to Generate Crystals for Structure Determination: An Update

Amy Wernimont\*, Aled Edwards

Midwest Center for Structural Genomics and Structural Genomics Consortium, University of Toronto, Toronto, Ontario, Canada

## Abstract

For every 100 purified proteins that enter crystallization trials, an average of 30 form crystals, and among these only 13–15 crystallize in a form that enables structure determination. In 2007, Dong *et al* reported that the addition of trace amounts of protease to crystallization trials—*in situ* proteolysis—significantly increased the number of proteins in a given set that produce diffraction quality crystals. 69 proteins that had previously resisted structure determination were subjected to crystallization with *in situ* proteolysis and ten crystallized in a form that led to structure determination (14.5% success rate). Here we apply *in situ* proteolysis to over 270 new soluble proteins that had failed in the past to produce crystals suitable for structure determination. These proteins had produced no crystals, crystals that diffracted poorly, or produced twinned and/or unmanageable diffraction data. The new set includes yeast and prokaryotic proteins, enzymes essential to protozoan parasites, and human proteins such as GTPases, chromatin remodeling proteins, and tyrosine kinases. 34 proteins yielded deposited crystal structures of 2.8 Å resolution or better, for an overall 12.6% success rate, and at least ten more yielded well-diffracting crystals presently in refinement. The success rate among proteins that had previously crystallized was double that of those that had never before yielded crystals. The overall success rate is similar to that observed in the smaller study, and appears to be higher than any other method reported to rescue stalled protein crystallography projects.

**Citation:** Wernimont A, Edwards A (2009) *In Situ* Proteolysis to Generate Crystals for Structure Determination: An Update. PLoS ONE 4(4): e5094. doi:10.1371/journal.pone.0005094

**Editor:** Haiwei Song, Institute of Molecular and Cell Biology, Singapore

**Received:** December 19, 2008; **Accepted:** February 3, 2009; **Published:** April 7, 2009

**Copyright:** © 2009 Wernimont et al. This is an open-access article distributed under the terms of the Creative Commons Attribution License, which permits unrestricted use, distribution, and reproduction in any medium, provided the original author and source are credited.

**Funding:** The Structural Genomics Consortium is a registered charity (Number 1097737) supported by the Canadian Institutes of Health Research, the Canadian Foundation for Innovation, and Genome Canada, through the Ontario Genomics Institute, GlaxoSmithKline, the Karolinska Institute, the Knut and Alice Wallenberg Foundation, the Ontario Innovation Trust, the Ontario Ministry for Research and Innovation, Merck & Co., Inc., the Novartis Research Foundation, the Swedish Agency for Innovation Systems, the Swedish Foundation for Strategic Research, and the Wellcome Trust. The funders had no role in study design, data collection and analysis, decision to publish, or preparation of the manuscript.

**Competing Interests:** The authors have declared that no competing interests exist.

\* E-mail: awernimont@gmail.com

## Introduction

The field of protein crystallography has seen great progress in crystallization, data collection, phasing techniques, crystallization screens, robotics, as well as in software for data reduction, phasing, model building and refinement [1]. However, the overall success rate (as measured by the number of deposited structures per number of selected targets) remains relatively low [2,3]. On average, only about 15–20% of protein targets that can be purified will then crystallize in a form from which a structure can be determined (<http://www.targetdb.pdb.org>; [http://thesgc.com/structures/target\\_progress.php](http://thesgc.com/structures/target_progress.php)).

The field of protein crystallization, which previously focused almost entirely on the optimization of crystallization strategies, is now increasingly addressing the improvement of the crystallization properties of the proteins themselves [4]. This trend began in the early 1990's, with the advent of molecular biology techniques and mass spectrometry. The use of these techniques allowed scientists to focus crystallization efforts on the most stable domains of target proteins, as identified by their pattern of resistance to limited proteolysis [5,6]. Stable domains crystallize more readily and often result in better-diffracting crystals [7,8,5]. Success rates were further increased by expressing many variations of the protein domain, as differences of a few residues at the N- or C- termini often have dramatic effects on soluble protein expression and

protein crystallization. Graslund *et al.* found that by screening ten derivatives of a given protein domain instead of one, the probability of generating a soluble protein increased two-fold and the probability of generating a structure increased four-fold [9].

Crystallization can also be promoted by changing the surface properties of the protein to reduce the conformational entropy of surface residues. The most straight-forward approach is to use reductive methylation of surface lysine residues [10]. In large, systematic studies, lysine methylation rescued 6% of a set of recalcitrant proteins [11,10]. Surface entropy can also be reduced by site-directed mutagenesis of clusters of charged residues [12]. Protein crystallization can also be facilitated by the addition of specific ligands or inhibitors, which bind to the protein and lower its intrinsic heterogeneity [13]. Finally, the addition of trace amounts of protease to the crystallization trials – *in situ* proteolysis – rescued 10 out of 69 different proteins (~14%) that had previously failed in crystallization and structure determination [14].

*In situ* proteolysis appears to be the most efficacious crystallization rescue strategy. However, while the study of Dong *et al.* was systematic and rigorous, all but one of the successful cases derived from a single experimenter, and the proteins were predominantly of bacterial origin. This prompted further inquiry into whether the method (1) would be applicable to human proteins, (2) would be as

successful in other hands, and (3) would be useful for those proteins for which dozens of variants had already been tested. This paper describes an expanded study: applying *in situ* proteolysis to 270 new proteins since the last paper, from prokaryotes and eukaryotes, and by dozens of scientists.

## Methods

All protein constructs contained an N-terminal hexahistidine tag, with a recognition site for TEV protease (MGSSH-HHHHHSSGRENLYFQG or MGSSHHHHHHSSGRENLYF-QGH or MAPEHHHHHHHDYDIPPTTENLYFQGA). Proteins were purified as described earlier [14,15,9]. All structures reported here have been deposited into the Protein Data Bank (PDB, [www.rcsb.org](http://www.rcsb.org)).

Proteases were ordered from Sigma-Aldrich and stock solutions made up as follows:  $\alpha$ -chymotrypsin (C3142) was dissolved in 1 mM HCl and 2 mM  $\text{CaCl}_2$  at a concentration of 1 mg/mL. Trypsin (T8003) was dissolved into 1 mM HCl and 2 mM  $\text{CaCl}_2$  at a concentration of 1.5 mg/mL. Elastase (E0127) was dissolved into 200 mM Tris-HCl buffer (pH 8.8) at a concentration of 1 mg/mL. Papain (P5306) was dissolved into water at a concentration of 1.2 mg/mL. Subtilisin A (P5380) was dissolved into 10 mM Na acetate and 5 mM Ca acetate at a concentration of 1 mg/mL. Endoproteinase Glu-C V8 (V8 protease) was dissolved into water at a concentration of 2 mg/mL. Stock solutions of protease were serially diluted into a buffer comprising 10 mM HEPES (pH 7.5) and 500 mM NaCl as needed.

## In situ proteolysis

*In situ* proteolysis was performed essentially as described [14], with the working set of proteases expanded, on a case-by-case basis, to include trypsin (at a range of 1:10000 to 1:10 v/v), V8 protease (at a range of 1:100 to 1:40 v/v), papain (at a range of 1:1200 to 1:10 v/v), thermolysin (at 1:20 v/v), and subtilisin (at 1:20 v/v).

## Pre-screening to identify a promising protease

Investigative limited proteolysis with a panel of proteases was used occasionally to identify a protease that generated promising degradation patterns, as detected by denaturing gel electrophoresis or mass spectrometry. 5–10  $\mu\text{L}$  of protein, dissolved at 10–20 mg/mL, was incubated with a range of proteases for thirty minutes at room temperature. The proteases were used at dilutions of 1:10, 1:100, and 1:1000. The reactions were stopped by the addition of SDS-Coomassie sample loading buffer for analysis by gel electrophoresis, or by formic acid for analysis by mass spectrometry. The protease(s) and concentration that yielded the largest, most stable domain were chosen for subsequent crystallization experiments.

## Results and Discussion

More than 270 proteins that failed to produce crystals or that produced crystal forms unsuitable for structure determination were subjected to *in situ* proteolysis crystallization trials over an eight-month period in 2008. This set comprised about 200 yeast or bacterial proteins, 70 human proteins, and 5 parasitic proteins. Of these, 34 proteins generated crystals of sufficient quality for structure determination (Table 1), for a rescue rate of  $\sim 13\%$ . 10 additional crystals in the set are being optimized, so the number of deposited structures may increase. We did not identify the protein cleavage sites using mass spectrometry, as was done in Dong et al, because of the effort involved. To indicate the approximate extent

of cleavage, we have included in the Supplementary Information the sequence of each protein construct that entered crystal trials and the regions of the protein for which electron density was absent (Text S1).

## Yeast and bacterial proteins

Of the initial 200 yeast and bacterial proteins, two-thirds had previously resisted crystallization, and the remaining third had formed crystals unsuitable for structure determination. These crystals were too small, very thin, formed stacks, or diffracted poorly and could not be improved upon with standard optimization strategies. Occasionally, crystals diffracted well but a very large number of copies in the asymmetric unit (more than 1MD in case of TM1086) made it impractical for structure determination by SAD/MAD techniques. *In situ* proteolysis treatment led to 20 structures from these recalcitrant proteins. Before the *in situ* proteolysis process, 11 had not previously crystallized at all (from  $\sim 135$  tested), and the other 9 had formed crystals unsuitable for structure determination (from  $\sim 65$  tested). From these data, the technique yields higher success rates within the subset of proteins that had previously formed poor crystals. This trend had been observed in the original study.

**Human Proteins.** Of the 70 human proteins targeted for crystallization by *in situ* proteolysis, 54 had not previously formed crystals, and 16 had formed poor-diffracting crystals. The set that had not formed crystals comprised both those that had not been tested previously as well as a set on which *in situ* proteolysis was performed in parallel with conventional crystallization trials. *In situ* proteolysis treatment led to 12 structures from these recalcitrant proteins. Of these, 5 were from the set of 16 that had previously formed crystals unsuitable for structure determination. This success rate was notably high.

## Parasitic proteins

Of the five proteins from human parasites targeted for crystallization by *in situ* proteolysis, none had previously crystallized. *In situ* proteolysis treatment led to 2 structures.

## Variations on in situ proteolysis experimental approaches

The intent of Dong *et al.* was to carry out a systematic, statistically significant, and well-controlled test of the efficacy of *in situ* proteolysis. Each new crystal was analyzed using mass spectrometry to ensure that the success of the method could be attributed directly to the use of proteases. Their paper strongly suggested that the method should be adopted as a primary crystallization strategy due to its high success rate, but was qualified by the fact that the method was being employed in a very controlled setting.

The intent of this study was to examine the efficacy of the method in practice, as carried out on a larger number of proteins by a larger number of experimenters. This strategy had the advantage of exploring the use of the method under less controlled conditions, in which individual investigators adopted slightly different methodologies and strategies. The disadvantage of this strategy is that any conclusions drawn have more caveats, due to the inability to control all aspects of the experiments. We describe here several variations to the original method that have proven successful.

**In situ proteolysis using a wider array of proteases.** In the study of 69 target proteins by Dong *et al.*, chymotrypsin was used at a single concentration. In a few cases trypsin was also tested at a single concentration. Chymotrypsin and trypsin are selective proteases: chymotrypsin cleaves on the C-terminal side of bulky hydrophobic side-chains such as phenylalanine, tyrosine, or tryptophan; and trypsin cleaves on the C-terminal side of basic

**Table 1.** List of deposited protein targets crystallized by *in situ* proteolysis.

| Target Name    | Number of Constructs Designed | PDB Code    | Crystal before protease | Resolution After Protease | Protease |
|----------------|-------------------------------|-------------|-------------------------|---------------------------|----------|
| CGD6_3220      | 20                            | <b>2RHD</b> | No crystal              | 2.1                       | T        |
| KIF22          | 22                            | <b>3BFN</b> | No crystal              | 2.3                       | V8       |
| EIF4A2         | 10                            | <b>3BOR</b> | No crystal              | 1.9                       | C        |
| EIF3J          | 12                            | <b>3BPJ</b> | No crystal              | 1.9                       | C        |
| RASL12         | 4                             | <b>3C5C</b> | Poor crystal            | 1.9                       | V8       |
| EPHA2          | 22                            | <b>3C8X</b> | Poor crystal            | 2.0                       | T        |
| REM2           | 8                             | <b>3CBQ</b> | low resolution          | 1.8                       | T        |
| BB3683_1_259   | 1                             | <b>3CNV</b> | No crystal              | 2.0                       | T        |
| NRAS           | 3                             | <b>3CON</b> | low resolution          | 1.7                       | C        |
| NR1D2-07       | 17                            | <b>3CQV</b> | No crystal              | 1.9                       | T        |
| TM1086         | 1                             | <b>3DCL</b> | large unit cell         | 2.3                       | C        |
| SETDB1         | 36                            | <b>3DLM</b> | No crystal              | 1.8                       | T        |
| ATC2088_1_254  | 1                             | <b>3DNH</b> | Poor crystal            | 1.9                       | T        |
| APC85800.6     | 9                             | <b>3DOA</b> | No crystal              | 2.8                       | C        |
| AF0924_65_195  | 1                             | <b>3DT5</b> | low resolution          | 1.9                       | T        |
| TA0507_1_224   | 1                             | <b>3DTZ</b> | Poor crystal            | 1.8                       | C        |
| TBC1D22B       | 6                             | <b>3DZX</b> | low resolution          | 2.3                       | C        |
| DDB1           | 1                             | <b>3E0C</b> | No crystal              | 2.4                       | C        |
| ARHGAP11A      | 24                            | <b>3EAP</b> | No crystal              | 2.3                       | V8       |
| TA0454         | 1                             | <b>3EEF</b> | No crystal              | 2.4                       | T        |
| APC7436        | 1                             | <b>3EET</b> | Twinned                 | 2.0                       | Therm    |
| XCC1504        | 2                             | <b>3EFG</b> | No crystal              | 2.0                       | C        |
| SSO8090        | 1                             | <b>3EXC</b> | low resolution          | 2.3                       | C        |
| YST5158_1_271  | 1                             | <b>3F3K</b> | Poor crystal            | 1.8                       | T        |
| YST4096_1_148  | 1                             | <b>3F4A</b> | Poor crystal            | 1.8                       | T        |
| YST2407_UMP    | 1                             | <b>3F4F</b> | Poor crystal            | 2.0                       | T        |
| YST5764_1_168  | 3                             | <b>3F5R</b> | No crystal              | 1.7                       | C        |
| RHA00566_1_118 | 1                             | <b>3F6O</b> | No crystal              | 1.9                       | Therm    |
| RHA06349_1_131 | 1                             | <b>3F6V</b> | No crystal              | 1.5                       | Pa       |
| ATC0911        | 1                             | <b>3FD3</b> | No crystal              | 1.7                       | V8       |
| APC61717       | 2                             | <b>3FDG</b> | Poor crystal            | 1.8                       | C        |
| ATC1720_1_144  | 1                             | <b>3FHM</b> | No crystal              | 2.7                       | V8       |
| PF1953         | 1                             | <b>3FIO</b> | No crystal              | 1.8                       | C        |
| PF10_0328      | 8                             | <b>3FKM</b> | No crystal              | 2.4                       | C        |

All structures deposited into the protein databank with corresponding accession code. Resolution numbers are rounded to the nearest tenth of an Angstrom.

C = chymotrypsin, T = Trypsin, Therm = Thermolysin, Pa = Papain, V8 = V8 protease.

doi:10.1371/journal.pone.0005094.t001

residues. It is likely that many target proteins were not optimal substrates for these enzymes, but in the original study, it was impractical and prohibitively expensive to systematically explore other proteases for the 70 target proteins.

In this study, although chymotrypsin and trypsin accounted for the most successes, other proteases were used, including V8 protease, thermolysin and papain. In total, 26 of the 34 structures derived from the use of chymotrypsin or trypsin, 5 structures derived from the use of the V8 protease, which cleaves on the C-terminal side of acidic residues, two structures derived from the use of thermolysin, and one from papain.

**Identifying promising proteases in advance of crystallization trials.** *In situ* proteolysis was implemented in

three different experimental strategies. In the first, exemplified by Dong *et al.*, chymotrypsin and/or trypsin were added to the target protein at a fixed concentration. In the second, promising proteases were identified in advance of *in situ* proteolysis, by pre-screening proteases in a range of concentrations and analyzing the results by mass spectrometry or gel electrophoresis. Of the 34 structures, 4 derived from the use of a protease identified in this manner. For example, the structure of N-carbamoylsarcosine amidase from *Thermoplasma acidophilum* was determined after *in situ* trypsinolysis. For this protein, previous attempts at removing the N-terminal 6-His tag with TEV protease were unsuccessful. The seleno-methionine protein was then subjected to limited proteolysis with chymotrypsin, trypsin, V8, and papain prior to

analysis by mass spectrometry. Trypsin yielded the largest stable domain and was used for crystallization assays. One condition generated crystals of excellent quality, and the structure was determined at 2.35 Å using SAD from a single data set (Luo *et al.*, in preparation).

The third approach, used largely when the protein was very abundant, is to screen a range of proteases using crystallization, rather than gel electrophoresis, as the metric. This strategy has the advantage that crystallization screens sample a wide range of solution conditions in which the proteases may have more favourable activities. This approach has proven particularly successful for human small GTPases. Commonly, these protein targets were crystallized with four different proteases in parallel – typically chymotrypsin, trypsin, subtilisin, and V8 – at a 1:100 v/v concentration. The target/protease mixtures were allowed to incubate on ice for thirty minutes, at which point they were subjected to crystallization trials. This technique was applied to 30 different target proteins; 8 structures resulted (PDB codes 3BFN, 3BOR, 3BPJ, 3C5C, 3CBQ, 3CON, 3DZX, and 3EAP), and several more are in process.

### Case studies

**Sites of cleavage after *in situ* proteolysis.** In most cases described here, as in the study of Dong *et al.*, the cleavage sites appear to reside at the N- and/or C-termini. For instance, the bromodomain of the PF10\_0328 protein from *Plasmodium falciparum* would not crystallize using typical crystallization techniques. Eight different constructs were designed and many different protein/crystal screen permutations were tested, with and without tag, and in the presence of six different proteases. Crystals appeared in conditions with chymotrypsin and the structure was solved from selenomethionine-containing protein. From the original construct of 166 residues, including a N-terminal His tag, only 120 residues could be seen in the electron density map. Mass spectrometry analysis of the crystals revealed a large protein peak at 17703 Daltons, which corresponds to chymotrypsin cleavage just C-terminal to Trp463, and no cleavage at the N-terminus (Figure 1).

There are a few instances in which the proteins were cleaved at an internal loop. For example, CGD6\_3220 is a GTPase from *Cryptosporidium parvum* that failed to crystallize despite repeated attempts with many different constructs. After trypsin treatment, the protein readily crystallized and the structure was solved to 2.2 Å (PDB code 2RHD). All of the protein could be modeled into the electron density map except for one loop corresponding to residues 68–76. Mass spectrometric analysis of the crystals revealed two internal cleavage events at residues 71 and 73, respectively. Interestingly, this loop is located at the interface between two molecules in the crystal lattice (Figure 2). When a highly homologous structure was superimposed on the model and the packing analyzed, the intact loop would have clashed with the symmetry-mate molecule and have inhibited this crystal formation.

***In situ* proteolysis removes large amount of protein.** As stated earlier, the most common cleavage events occurred near the N and C termini, and usually 20–40 residues were removed. However, in one previously reported case [14] and in one instance reported in this work, a larger polypeptide fragment was removed. For the eukaryotic translation initiation factor 3 (EIF3J; PDB code 3BPJ), 12 different protein constructs were designed in attempts to refine the optimal domain boundaries for successful crystallization. None of the proteins purified from these constructs yielded a diffraction-quality crystal. Chymotrypsin treatment generated a crystal that provided a 1.8 Å dataset from which the structure was solved. The structure revealed that almost half of the protein had been removed; the initial construct contained residues 76–220 but

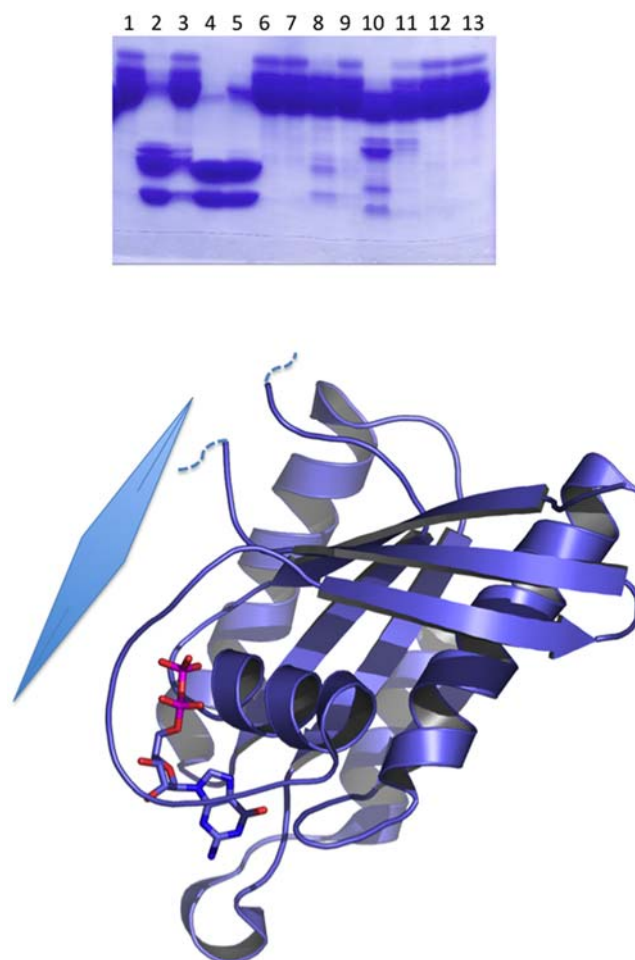

**Figure 1. CGD6\_3220 proteolytic digestion and subsequent crystal structure.** (A) SDS-PAGE gel, lane 1 is untreated protein. Following lanes consist of two concentrations each of chymotrypsin, Trypsin, Elastase, Papain, Subtilisin, and V8 respectively. Note both chymotrypsin and trypsin yield 2 large stable domains. (B) Ribbon diagram of CGD6\_3220. Dotted lines signify missing density, large diamond represents plane of crystal packing.  
doi:10.1371/journal.pone.0005094.g001

only the C-terminal fragment (141–220) was ordered in the crystal structure. Secondary structure prediction using the JPred server [16] suggested this region was buried, and thus this position would likely not have been selected for construct design.

**Immediate successes after exhaustive trials.** Our default strategy for human proteins is to design 10–15 different constructs for each protein and to attempt to crystallize each one that can be purified, in both the presence and absence of the histidine tag [9]. If this first round fails, more constructs with slight variations at the N- and C-terminal positions are often created, though this strategy is met with significantly diminishing returns. *In situ* proteolysis is now being used to resuscitate some of the failed projects. In one case, 36 constructs were purified for the histone methyltransferase SETDB1 protein, and none crystallized, either with or without the histidine tag. In the first experiment with *in situ* proteolysis, excellent crystals were obtained directly from a matrix screen, and after minor optimization led to crystals diffracting to 1.8 Å (PDB code 3DLM).

The heme-binding transcription factor rev-erbβ and its *Drosophila* orthologue E75 were the subject of extensive efforts



use of chymotrypsin and trypsin would capture most of the cases that would be successful. The method appears doubly effective when applied to proteins that have already formed crystals as compared to proteins that have never crystallized.

## Supporting Information

**Text S1** Original sequences of proteins subjected to *in situ* proteolysis.

Found at: doi:10.1371/journal.pone.0005094.s001 (0.05 MB DOC)

**Figure S1** Crystal structure figure of a possible non-physiological dimer. Possible non-physiological dimer obtained from a 3.5 Å dataset collected on a crystal of rev-erbβ.

Found at: doi:10.1371/journal.pone.0005094.s002 (0.48 MB TIF)

## Acknowledgments

### Complete list of authors

**Midwest Center for Structural Genomics:** Changsoo Chang, Maksymilian Chruszcz, Marianne Cuff, H. Cui, Marcin Cymborowski, Rosa DiLeo, Olga Egorova, Elena Evdokimova, Ekaterina Filippova,

JunGu, Jennifer Guthrie, Alexandr Ignatchenko, Andrzej Joachimiak, Natalie Klostermann, Youngchang Kim, Yuri Korniyenko, H. Krause, M. Kudritska, Hai-Bin Luo, Wladek Minor, J. Osipiuk, Keith Pardee, Qjuni Que, J. Reinking, Alexei Savchenko, A. Schuetz, Tatiana Skarina, Kemin Tan, Alexander Yakunin, Xiaohui Xu Adelinda Yee, Veronica Yim, Rongguang Zhang, Heping Zheng, Matthew D. Zimmerman

**Structural Genomics Consortium:** Maria Amaya, Cheryl Arrow-smith, George V Avvakumov, Helena Berghlund, Alexey Bochkarev, C. Butler-Cole, Lars-Göran Dahlgren, Sirano Dhe-Paganon, Slav Dimov, Ludmila Dombrowski, Aiping Dong, Patrick Finerty Jr., Susanne Flodin, Alex Flores, Susanne Gräslund, Martin Hammerström, H. Hao, Maria Dolores Herman, Bum-Soo Hong, Raymond Hui, Ida Johansson, T. Karlberg, Yongson Liu, R. Loppnau, F. MacKenzie, Martina Nilsson, Lyudmila Nedyalkova, Pär Nordlund, Tomas Nyman, Jinrong Min, Hui Ouyang, Hee-won Park, Chao Qi, A. Schuetz, A. Seitova, Limin Shen, Yang Shen, Deepthi Sukumard, Wolfram Tempel, Yufeng Tong, Lionel Tresagues, Masoud Vedadi, John R Walker, Johan Weigelt, Martin Welin, Hong Wu, Ting Xiao, L. Xu, Hong Zeng, Haizhong Zhu.

## Author Contributions

Conceived and designed the experiments: AE. Analyzed the data: AKW AE. Wrote the paper: AKW AE.

## References

1. Leulliot N, Tresaugues L, Bremang M, Sorel I, Ulryck N, et al. (2005) High-throughput crystal-optimization strategies in the south paris yeast structural genomics project: One size fits all? Acta Crystallogr D Biol Crystallogr 61(Pt 6): 664–670.
2. Grabowski M, Joachimiak A, Otwinowski Z, Minor W (2007) Structural genomics: Keeping up with expanding knowledge of the protein universe. Curr Opin Struct Biol 17(3): 347–353.
3. O'Toole N, Grabowski M, Otwinowski Z, Minor W, Cygler M (2004) The structural genomics experimental pipeline: Insights from global target lists. Proteins 56(2): 201–210.
4. Dale GE, Oefner C, D'Arcy A (2003) The protein as a variable in protein crystallization. J Struct Biol 142(1): 88–97.
5. Cohen SL, Ferre-D'Amare AR, Burley SK, Chait BT (1995) Probing the solution structure of the DNA-binding protein max by a combination of proteolysis and mass spectrometry. Protein Sci 4(6): 1088–1099.
6. Bochkarev A, Barwell JA, Pfuetzner RA, Furey W Jr, Edwards AM, et al. (1995) Crystal structure of the DNA-binding domain of the epstein-barr virus origin-binding protein EBNA 1. Cell 83(1): 39–46.
7. Gao X, Bain K, Bonanno JB, Buchanan M, Henderson D, et al. (2005) High-throughput limited proteolysis/mass spectrometry for protein domain elucidation. J Struct Funct Genomics 6(2–3): 129–134.
8. Malawski GA, Hillig RC, Monteclaro F, Eberspaecher U, Schmitz AA, et al. (2006) Identifying protein construct variants with increased crystallization propensity—a case study. Protein Sci 15(12): 2718–2728.
9. Gräslund S, Sagemark J, Berghlund H, Dahlgren LG, Flores A, et al. (2008) The use of systematic N- and C-terminal deletions to promote production and structural studies of recombinant proteins. Protein Expr Purif 58(2): 210–221.
10. Walter TS, Meier C, Assenberg R, Au KF, Ren J, et al. (2006) Lysine methylation as a routine rescue strategy for protein crystallization. Structure 14(11): 1617–1622.
11. Kim Y, Quartey P, Li H, Volkart L, Hatzos C, et al. (2008) Large-scale evaluation of protein reductive methylation for improving protein crystallization. Nat Methods 5(10): 853–854.
12. Derewenda ZS (2004) The use of recombinant methods and molecular engineering in protein crystallization. Methods 34(3): 354–363.
13. Vedadi M, Niesen FH, Allali-Hassani A, Fedorov OY, Finerty PJ Jr, et al. (2006) Chemical screening methods to identify ligands that promote protein stability, protein crystallization, and structure determination. Proc Natl Acad Sci U S A 103(43): 15835–15840.
14. Dong A, Xu X, Edwards AM, Midwest Center for Structural Genomics, Structural Genomics Consortium, et al. (2007) In situ proteolysis for protein crystallization and structure determination. Nat Methods 4(12): 1019–1021.
15. Vedadi M, Lew J, Artz J, Amani M, Zhao Y, et al. (2007) Genome-scale protein expression and structural biology of plasmodium falciparum and related apicomplexan organisms. Mol Biochem Parasitol 151(1): 100–110.
16. Cole C, Barber JD, Barton GJ (2008) The jpred 3 secondary structure prediction server. Nucleic Acids Res 36(Web Server issue): W197–201.
17. Raghuram S, Stayrook KR, Huang P, Rogers PM, Nosie AK, et al. (2007) Identification of heme as the ligand for the orphan nuclear receptors REV-ERBalpha and REV-ERBbeta. Nat Struct Mol Biol 14(12): 1207–1213.
18. Reinking J, Lam MM, Pardee K, Sampson HM, Liu S, et al. (2005) The drosophila nuclear receptor e75 contains heme and is gas responsive. Cell 122(2): 195–207.
